# Supplementary material
Source: publisher site journal article supplement (https://www.dovepress.com/get_supplementary_file.php?f=497284.docx)
Supplement: Supplementary file 1 [file get_supplementary_file.php]

**Figure S1 Correlation analysis between risk score of prognostic model and immune cell infiltration.**


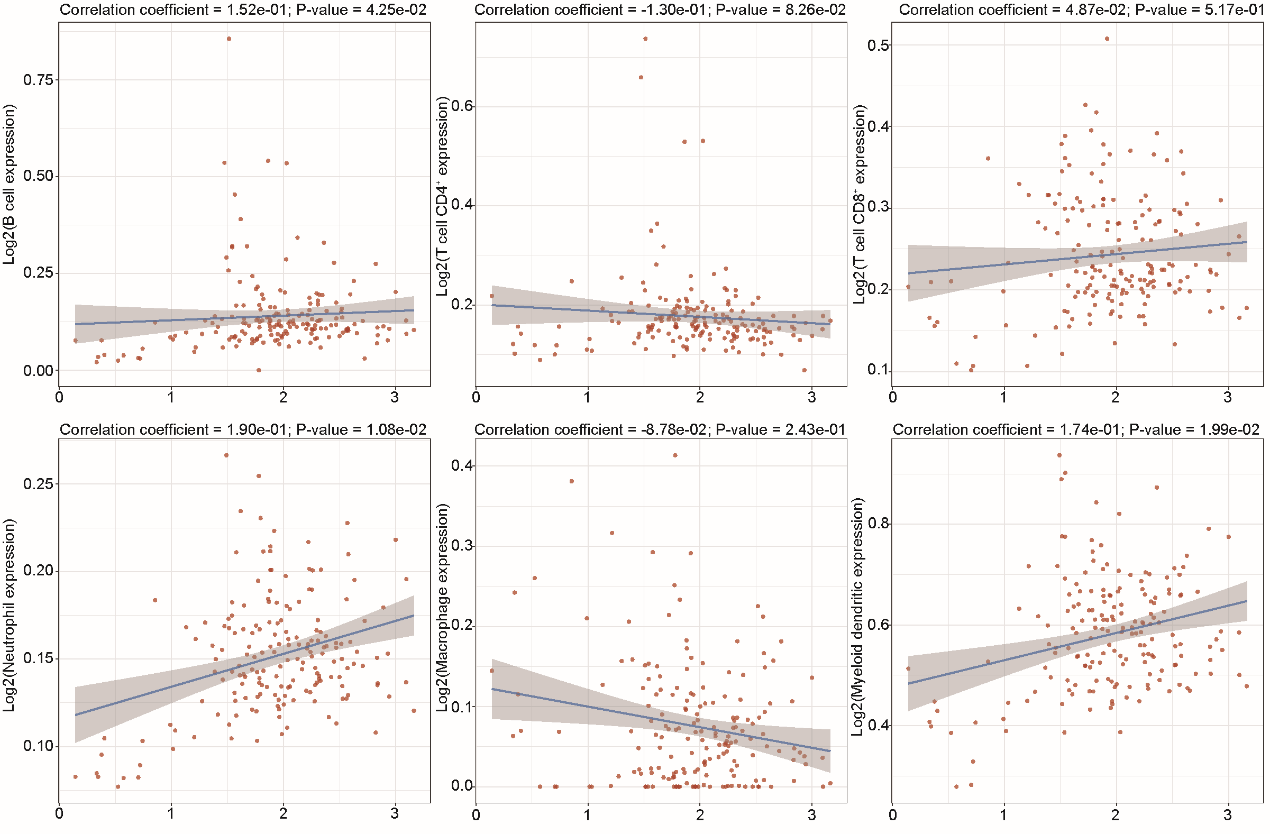


**Table S1 Display of primer sequence used in RT-qPCR experiment**

| qPCR primer | Sequence |
| --- | --- |
| human-KIF18A- forward | CTTGGACCAGTTCAGCCTATTCC |
| human-KIF18A- reverse | GCACACTTTGAGATGGTGGAGAC |
| human-GAPDH- forward | GTCTCCTCTGACTTCAACAGCG |
| human-GAPDH- reverse | ACCACCCTGTTGCTGTAGCCAA |
